# Supplementary material for: Characteristics of the main primary source profiles of particulate matter across China: from 1987 to 2017
Source: Copernicus journal article supplement (doi:10.5194/acp-2018-687), 2018-09-05
Supplement: Supplementary file 1 [file acp-2018-687-supplement.pdf]

1 *Supplementary materials to*  
2 **Characteristics of the main primary source chemical profiles**  
3 **of particulate matter across China: from 1987 to 2017**

4 Xiaohui Bi, Yuan Cheng, Qili Dai, Jianhui Wu, Jiaying Zhang, Yufen Zhang, Lu Wang,  
5 Yingze Tian, Yinchang Feng\*

6 State Environmental Protection Key Laboratory of Urban Ambient Air Particulate Matter  
7 Pollution Prevention and Control, College of Environment Science and Engineering, Nankai  
8 University, Tianjin, 300350, China

9

10

11 Correspondence to: Yinchang Feng ([fengyc@nankai.edu.cn](mailto:fengyc@nankai.edu.cn))

12

13

14

15

16

17

18

19

20

21

22

23

24

25

26

27

28

29 This Supplementary materials includes 1 table and 1 figure.

30

31

32

33

34

35

36

37

**Table S1.** Source profiles statistics (Cluster analysis)

---

| Code   | Source category      | Size              | Profiles |
|--------|----------------------|-------------------|----------|
| CE1-13 | Cooking emissions    | PM <sub>2.5</sub> | 13       |
| SD1-20 | Soil dust            | PM <sub>2.5</sub> | 20       |
| RD1-26 | Road dust            | PM <sub>2.5</sub> | 26       |
| IE1-43 | Industrial emissions | PM <sub>2.5</sub> | 43       |
| VE1-22 | Vehicle emissions    | PM <sub>2.5</sub> | 22       |
| BB1-24 | Biomass burning      | PM <sub>2.5</sub> | 24       |
| CC1-66 | Coal combustion      | PM <sub>2.5</sub> | 66       |

---

38

39

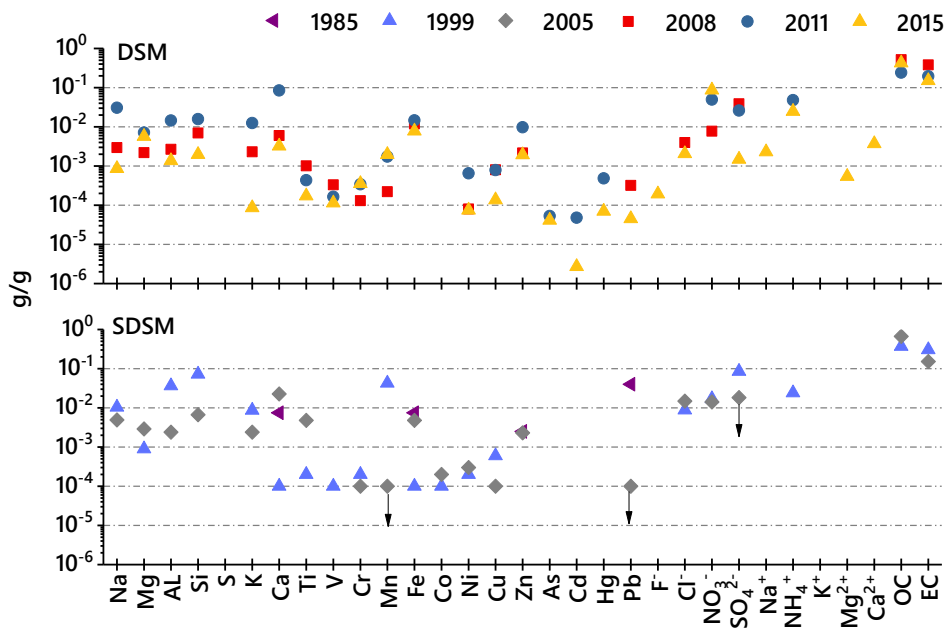

40

41 **Figure S1.** Characteristics of chemical profiles for particulate matter emissions from vehicles  
 42 obtained by different sampling methods. Different colors denote different years of these  
 43 measurements. DSM and SDSM denote direct sampling method and source dominated  
 44 sampling method, respectively. Data were collected from the source library of Nankai  
 45 University, Zhang et al.(2000), Guo et al.(2013), Li et al.(2016), Zhang et al.(2009), Dai et  
 46 al.(1986), Han et al.(2009) and Bi et al.(2007).

47
